# Supplementary material for: MultiSeq: unifying sequence and structure data for evolutionary analysis
Source: Springer Nature journal article supplement (doi:10.1186/1471-2105-7-382), 2006-08-16
Supplement: 12859_2006_1121_MOESM1_ESM.pdf [file 12859_2006_1121_MOESM1_ESM.pdf]

①

| Sequence Name                       |  | 40  | 50                                                |
|-------------------------------------|--|-----|---------------------------------------------------|
| <b>tRNA</b>                         |  |     |                                                   |
| <input type="checkbox"/> 1asy_R     |  | 629 | U G U C X C G U G C C A G A U . X G G G G T       |
| <input type="checkbox"/> 1c0a_B     |  | 630 | U X U C A C G C A G G G G X U C G C G G G X       |
| <b>Structures</b>                   |  |     |                                                   |
| <input type="checkbox"/> 1b8a_A     |  | 1   | . . . M Y R T H Y S S E I T . . . E E L N G Q     |
| <input type="checkbox"/> 1l0w_A     |  | 1   | . . . M R . R T H Y A G S L R . . . E T H V G E   |
| <input type="checkbox"/> 1asy_A     |  | 83  | D R T G Q K R V K F V D L D E . . . A K D S D K   |
| <input type="checkbox"/> 1il2_A     |  | 1   | . . . M . R T E Y C G Q L R . . . L S H V G Q     |
| <input type="checkbox"/> 1n9w_A     |  | 1   | . . . M R V L V R D L K . . . A H V G Q           |
| <input type="checkbox"/> 1g51_A     |  | 1   | . . . M R . R T H Y A G S L R . . . E T H V G E   |
| <input type="checkbox"/> 1eov_A     |  | 83  | D R T G Q K R V K F V D L D E . . . A K D S D K   |
| <input type="checkbox"/> 1efw_A     |  | 1   | . . . M R . R T H Y A G S L R . . . E T H V G E   |
| <input type="checkbox"/> 1c0a_A     |  | 1   | . . . M . R T E Y C G Q L R . . . L S H V G Q     |
| <b>Sequences</b>                    |  |     |                                                   |
| <input type="checkbox"/> SYD1_STRMU |  | 1   | . . . M K E L F I G N Y G . . . L E Q V G Q       |
| <input type="checkbox"/> SYD2_STRMU |  | 1   | . . . M K R S M Y A G A V R . . . S E H I G Q     |
| <input type="checkbox"/> SYDC_YEAST |  | 30  | D R T G Q K R V K F V D L D E . . . A K D S D K   |
| <input type="checkbox"/> SYDM_YEAST |  | 23  | K K F L F R K D T S T I K Q L K G L S S G Q       |
| <input type="checkbox"/> SYD_AERPE  |  | 1   | . . . M L K D R F I A D I I A S K E S L V G G     |
| <input type="checkbox"/> SYD_AGRT5  |  | 1   | . . . M H R Y R S H T C A A L R . . . K S D V G E |
| <input type="checkbox"/> SYD_ANASP  |  | 1   | . . . M R T H Y C G E L R . . . Q K D I G E       |
| <input type="checkbox"/> SYD_AQUAE  |  | 1   | Y G D F K R T K Y C G E V S . . . E E D I G K     |
| <input type="checkbox"/> SYD_ARCFU  |  | 1   | . . . M R V Y T A D V K . . . P E M E G Q         |
| <input type="checkbox"/> SYD_BACAN  |  | 1   | . . . M A E R T H A C G K V T . . . V E A V G Q   |
| <input type="checkbox"/> SYD_BACCR  |  | 1   | . . . M A E R T H A C G K V T . . . V E A V G Q   |

②

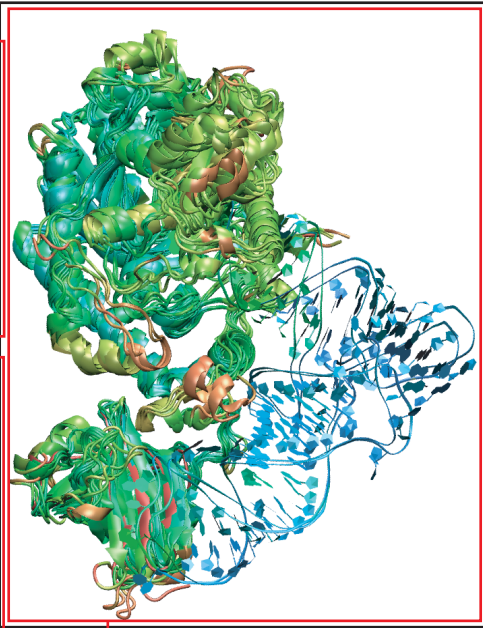

③
