# Supplementary material for: MultiSeq: unifying sequence and structure data for evolutionary analysis
Source: Springer Nature journal article supplement (doi:10.1186/1471-2105-7-382), 2006-08-16
Supplement: 12859_2006_1121_MOESM2_ESM.pdf [file 12859_2006_1121_MOESM2_ESM.pdf]

1

2

3

4

| Name       | E Score | 410             | 420                                               | 430 | Filter Options                              |
|------------|---------|-----------------|---------------------------------------------------|-----|---------------------------------------------|
| SYK_GLOVI  | 1e-19   | N P Y P Y R Y E | . R T H M A . . G D L Q . . . . . A K             |     | E Score: e-5 <input type="text"/>           |
| 666876     | 2e-19   | T Q I C K I K S |                                                   |     | Redundancy Cutoff: 100 <input type="text"/> |
| 67920132   | 2e-19   | N G E E V E V D |                                                   |     | Superkingdom: All                           |
| 23130228   | 3e-19   | A D L A S G E E |                                                   |     | Archaea                                     |
| 57159018   | 3e-19   | M I D K V       | . . . Y C . . A D V T . . . . . P E               |     | Bacteria                                    |
| 1N9W       | 4e-19   | R V L V R D L K |                                                   |     | Eukaryota                                   |
| 46199389   | 5e-19   | R V L V R D L K |                                                   |     |                                             |
| SYK_SYNY3  | 5e-19   | R D L S N G E E |                                                   |     | Kingdom: All                                |
| SYK_SYNEL  | 1e-18   | A H L A A G E A |                                                   |     | Fungi                                       |
| SYK_STRMU  | 1e-18   | D P F G K R F E | . R T A T S . . . G Q L K E K Y A D K T K E E L H |     | Metazoa                                     |
| 50256771   | 1e-18   | E E V I D M P A |                                                   |     | Viridiplantae                               |
| 57227974   | 1e-18   | E E V I D M P A |                                                   |     |                                             |
| 68179432   | 3e-18   | A A A L E G C E |                                                   |     | Phylum: All                                 |
| SYK_PROMA  | 4e-18   | P N G Q D R E I |                                                   |     | Actinobacteria                              |
| 55738646   | 5e-18   | D P F G K R F E | . R T A T S . . . G Q L K E K Y A D K T K E E L H |     | Aquificae                                   |
| SYK_STRR6  | 5e-18   | K Y A N L D K E |                                                   |     | Arthropoda                                  |
| 55820759   | 5e-18   | D P F G K R F E | . R T A T S . . . G Q L K E K Y A D K T K E E L H |     | Ascomycota                                  |
| SYK_STRPN  | 6e-18   | K Y A N L D K E |                                                   |     | Bacteroidetes                               |
| 15900610   | 6e-18   | K Y A N L D K E |                                                   |     | Chlamydiae                                  |
| 62526807   | 6e-18   | D P F G K R F E | . R T A T S . . . G Q L K E K Y A D K T K E E L H |     | Apply Filter                                |
| SYK1_SALTI | 6e-18   | E E L E A L N I |                                                   |     |                                             |
| SYK_ENTFA  | 8e-18   | Y D N H T K E E |                                                   |     |                                             |
| 56707357   | 8e-18   | E L E E L D N K |                                                   |     |                                             |
