# Supplementary material for: MultiSeq: unifying sequence and structure data for evolutionary analysis
Source: Springer Nature journal article supplement (doi:10.1186/1471-2105-7-382), 2006-08-16
Supplement: 12859_2006_1121_MOESM3_ESM.pdf [file 12859_2006_1121_MOESM3_ESM.pdf]

1

3

4

| Sequence Name                       | 90                                    |
|-------------------------------------|---------------------------------------|
| <b>VMD Structures</b>               |                                       |
| <input type="checkbox"/> 1b8a_A     | 1 . . . . . M Y R T H Y S S E         |
| <input type="checkbox"/> 110w_A     | 1 . . . . . M R . R T H Y A G S       |
| <input type="checkbox"/> 1asy_A     | 83 S R D S D R T G Q K R V K F V D    |
| <input type="checkbox"/> 1ii2_A     | 1 . . . . . M . R T E Y C G Q         |
| <input type="checkbox"/> 1n9w_A     | 1 . . . . . M R V L V R D             |
| <input type="checkbox"/> 1g51_A     | 1 . . . . . M R . R T H Y A G S       |
| <input type="checkbox"/> 1eov_A     | 83 S R D S D R T G Q K R V K F V D    |
| <input type="checkbox"/> 1efw_A     | 1 . . . . . M R . R T H Y A G S       |
| <input type="checkbox"/> 1c0a_A     | 1 . . . . . M . R T E Y C G Q         |
| <b>Sequences</b>                    |                                       |
| <input type="checkbox"/> SYDC_YEAST | 82 S R D S D R T G Q K R V K F V D    |
| <input type="checkbox"/> SYD_CAEL   | 57 G L V N S K E K K V L N F L K V    |
| <input type="checkbox"/> SYD_HUMAN  | 33 S M I Q S Q E K P D R V L V R V    |
| <input type="checkbox"/> SYD_MOUSE  | 33 S M I Q S Q E K P D R V L V R V    |
| <input type="checkbox"/> SYD_RAT    | 33 S M I Q S Q E K P D R V L V R V    |
| <input type="checkbox"/> SYD_AERPE  | 1 . . . . . M L K D R F I A D I       |
| <input type="checkbox"/> SYD_METMA  | 1 . . . . . M S L A N L R T H Y T A D |
| <input type="checkbox"/> SYD_HALN1  | 1 . . . . . M L E R T Y I E D         |
| <input type="checkbox"/> SYD_THEAC  | 1 . . . . . M P R T Y I D T           |
| Minimum Percent Identity: 17.3%     |                                       |

Group sequences by this classification:

- domain
- kingdom
- phylum
- class
- order
- family
- genus

OK Cancel

| Sequence Name                       | 90                                    |
|-------------------------------------|---------------------------------------|
| <b>Eukaryota:Fungi</b>              |                                       |
| <input type="checkbox"/> 1asy_A     | 83 S R D S D R T G Q K R V K F V D    |
| <input type="checkbox"/> 1eov_A     | 83 S R D S D R T G Q K R V K F V D    |
| <input type="checkbox"/> SYDC_YEAST | 82 S R D S D R T G Q K R V K F V D    |
| <b>Eukaryota:Metazoa</b>            |                                       |
| <input type="checkbox"/> SYD_CAEL   | 57 S K . . . E K K V L N F L K V K E  |
| <input type="checkbox"/> SYD_HUMAN  | 33 S Q . . . E K P D R V L V R V R D  |
| <input type="checkbox"/> SYD_MOUSE  | 33 S Q . . . E K P D R V L V R V K D  |
| <b>Archaea:Crenarcha</b>            |                                       |
| <input type="checkbox"/> SYD_AERPE  | 1 . . . . . M L K D R F I A D         |
| <b>Archaea:Euryarchaeota</b>        |                                       |
| <input type="checkbox"/> 1n9w_A     | 1 . . . . . M R V L V R D             |
| <input type="checkbox"/> 1b8a_A     | 1 . . . . . M Y R T H Y S S E         |
| <input type="checkbox"/> SYD_METMA  | 1 . . . . . M S L A N L R T H Y T A D |
| <input type="checkbox"/> SYD_HALN1  | 1 . . . . . M E N R T Y T A D         |
| <input type="checkbox"/> SYD_THEAC  | 1 . . . . . M L S I A E               |
| <input type="checkbox"/> SYD_PYRHO  | 1 . . . . . M I E K V Y C Q E         |
| <b>Bacteria:Proteobacteria</b>      |                                       |
| <input type="checkbox"/> 110w_A     | 1 . . . . . M R . R T H Y A G S       |
| <input type="checkbox"/> 1ii2_A     | 1 . . . . . M . R T E Y C G Q         |

2

A

B
