# Supplementary material for: MultiSeq: unifying sequence and structure data for evolutionary analysis
Source: Springer Nature journal article supplement (doi:10.1186/1471-2105-7-382), 2006-08-16

1

Sequence Name: SYDC\_YEAST  
 Source Organism: Saccharomyces cerevisiae  
 Common Name: yeast  
 EC Number: 6.1.1.12  
 EC Description: Aspartate-tRNA ligase.  
 Description: Aspartyl-tRNA synthetase, cytoplasmic (EC 6.1.1.12) (Aspartate-tRNA ligase) (AspRS) - Saccharomyces cerevisiae (Baker's yeast).  
 Data Sources: sp=P04802,SYDC\_YEAST; pdb=1E0VA  
 Lineage: Eukaryota > Fungi > Ascomycota > Saccharomycotina > Saccharomycetes > Saccharomycetales  
 Notes: [Empty field]  
 OK Cancel

2

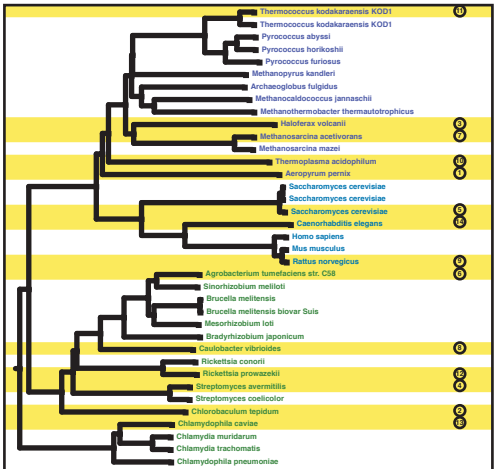

3

4

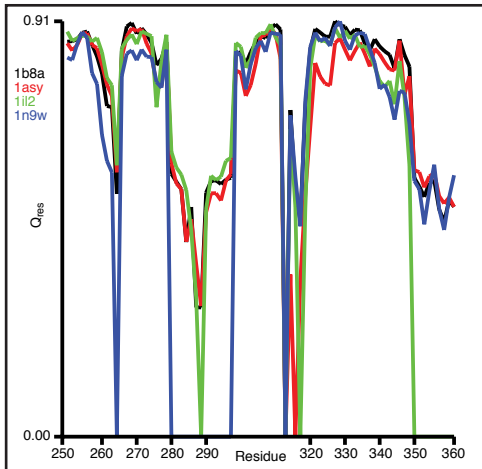

Supplement: 12859_2006_1121_MOESM4_ESM.pdf [file 12859_2006_1121_MOESM4_ESM.pdf]
